# Supplementary material for: Systematic and evolutionary engineering of a xylose isomerase-based pathway in Saccharomyces cerevisiae for efficient conversion yields
Source: PubMed Central journal article supplement (PMC4147937; doi:10.1186/s13068-014-0122-x), 2014-08-20

**Supplementary Figure 1.** *The aerobic cell growth of the evolutionary engineered strain of SXA-R2P-E on xylose.* The evolutionary engineering improved the aerobic cell growth of the strain harboring a xylose isomerase-based pathway on xylose. The evolved strain of *SXA-R2P-E* (black) reached stationary growth phase faster than the rationally engineered strain of *SXA-R2P* (grey). Error bars represent the standard deviation of biological triplicates.

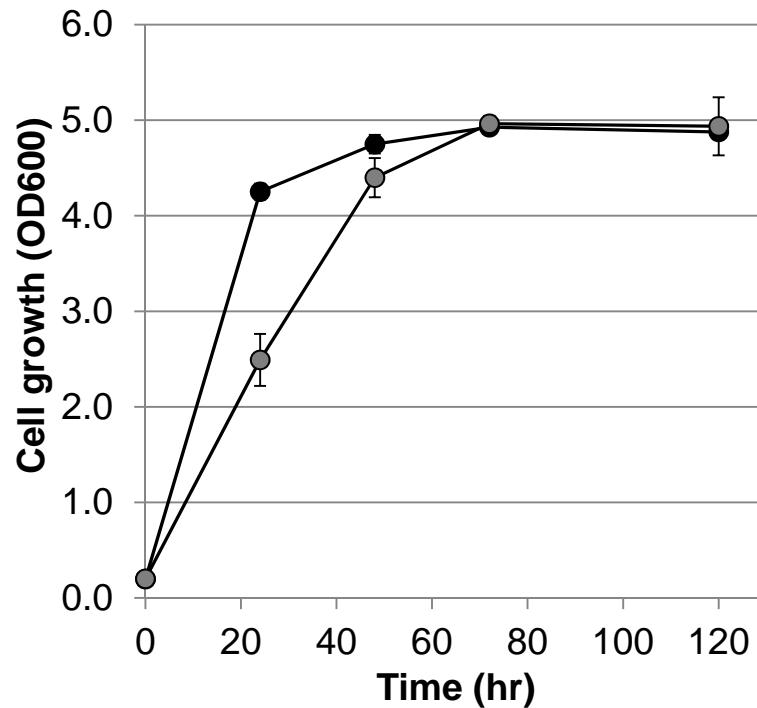

Supplement: 13068_2014_122_MOESM1_ESM.pdf [file 13068_2014_122_MOESM1_ESM.pdf]
