# Supplementary material for: Systematic and evolutionary engineering of a xylose isomerase-based pathway in Saccharomyces cerevisiae for efficient conversion yields
Source: PubMed Central journal article supplement (PMC4147937; doi:10.1186/s13068-014-0122-x), 2014-08-20

**Supplementary Figure 2.** *Anaerobic fermentation of xylose with the evolved strain with low initial OD.* Ethanol production (black) and xylose consumption (white) profiles of the evolved strain were measured during anaerobic batch fermentation in a bioreactor. The evolved strain was inoculated at an initial OD of 1. Medium pH was maintained at 6.0 with 2.5 N NaOH. Error bars represent the standard deviation of technical duplicates.

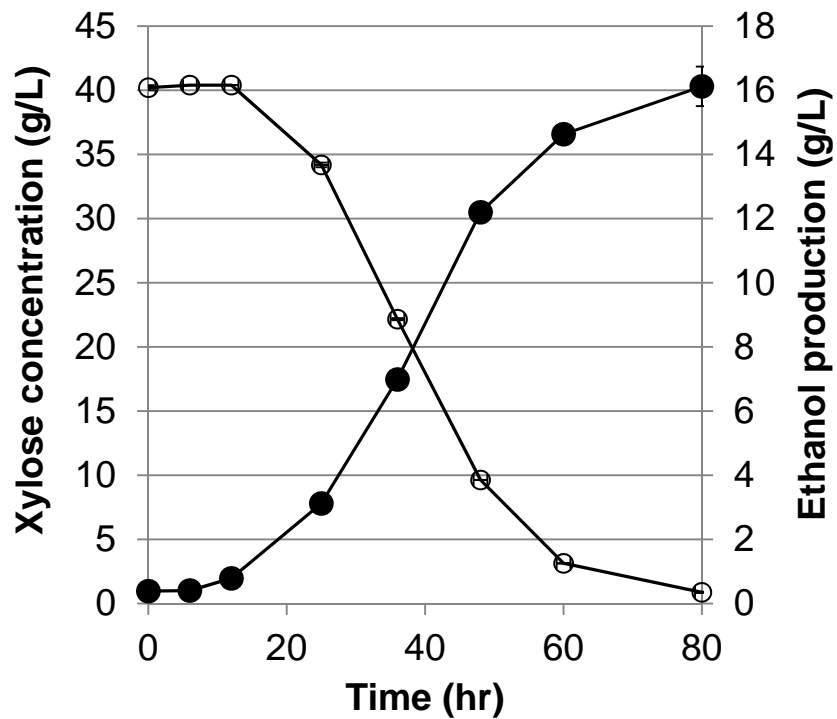

Supplement: 13068_2014_122_MOESM2_ESM.pdf [file 13068_2014_122_MOESM2_ESM.pdf]
